# Supplementary material
Source: PubMed Central journal article supplement (PMC10023469)
Supplement: NIHMS1863163-supplement-Supp_tables.pdf [file NIHMS1863163-supplement-Supp_tables.pdf]

*Supplemental Table 1*  
**COREQ Checklist**

| No. Item                                       | Description                                                                                                                                                      | Included |
|------------------------------------------------|------------------------------------------------------------------------------------------------------------------------------------------------------------------|----------|
| <b>Domain 1: Research Team And Reflexivity</b> |                                                                                                                                                                  |          |
| Personal Characteristics                       |                                                                                                                                                                  |          |
| 1. Interviewer/facilitator                     | Which author/s conducted the interview or focus group?                                                                                                           | x        |
| 2. Credentials                                 | What were the researcher's credentials? <i>E.g., PhD, MD</i>                                                                                                     | x        |
| 3. Occupation                                  | What was their occupation at the time of the study?                                                                                                              | x        |
| 4. Gender                                      | Was the researcher male or female?                                                                                                                               | x        |
| 5. Experience and training                     | What experience or training did the researcher have?                                                                                                             | x        |
| Relationship with participants                 |                                                                                                                                                                  |          |
| 6. Relationship established                    | Was a relationship established prior to study commencement?                                                                                                      | x        |
| 7. Participant knowledge of the interviewer    | What did the participants know about the researcher? <i>E.g., Personal goals, reasons for doing the research</i>                                                 | x        |
| 8. Interviewer characteristics                 | What characteristics were reported about the interviewer/facilitator? <i>E.g., Bias, assumptions, reasons and interests in the research topic</i>                | x        |
| <b>Domain 2: Study design</b>                  |                                                                                                                                                                  |          |
| Theoretical framework                          |                                                                                                                                                                  |          |
| 9. Methodological orientation and theory       | What methodological orientation was stated to underpin the study? <i>E.g., grounded theory, discourse analysis, ethnography, phenomenology, content analysis</i> | x        |
| Participant selection                          |                                                                                                                                                                  |          |
| 10. Sampling                                   | How were participants selected? <i>E.g., purposive, convenience, consecutive, snowball</i>                                                                       | x        |
| 11. Method of approach                         | How were participants approached? <i>E.g., face-to-face, telephone, mail, email</i>                                                                              | x        |
| 12. Sample size                                | How many participants were in the study?                                                                                                                         | x        |
| 13. Non-participation                          | How many people refused to participate or dropped out? What were the reasons for this?                                                                           | x        |
| Setting                                        |                                                                                                                                                                  |          |
| 14. Setting of data collection                 | Where was the data collected? <i>E.g., home, clinic, workplace</i>                                                                                               | x        |
| 15. Presence of non-participants               | Was anyone else present besides the participants and researchers?                                                                                                | x        |
| 16. Description of sample                      | What are the important characteristics of the sample? <i>E.g., demographic data, date</i>                                                                        | x        |
| Data collection                                |                                                                                                                                                                  |          |
| 17. Interview guide                            | Were questions, prompts, guides provided by the authors? Was it pilot tested?                                                                                    | n/a      |
| 18. Repeat interviews                          | Were repeat interviews carried out? If yes, how many?                                                                                                            | n/a      |
| 19. Audio/visual recording                     | Did the research use audio or visual recording to collect the data?                                                                                              | x        |
| 20. Field notes                                | Were field notes made during and/or after the interview or focus group?                                                                                          | x        |
| 21. Duration                                   | What was the duration of the interviews or focus group?                                                                                                          | x        |
| 22. Data saturation                            | Was data saturation discussed?                                                                                                                                   | n/a      |
| 23. Transcripts returned                       | Were transcripts returned to participants for comment and/or correction?                                                                                         | n/a      |
| <b>Domain 3: Analysis and findings</b>         |                                                                                                                                                                  |          |
| Data analysis                                  |                                                                                                                                                                  |          |
| 24. Number of data coders                      | How many data coders coded the data?                                                                                                                             | n/a      |
| 25. Description of the coding tree             | Did authors provide a description of the coding tree?                                                                                                            | n/a      |
| 26. Derivation of themes                       | Were themes identified in advance or derived from the data?                                                                                                      | n/a      |
| 27. Software                                   | What software, if applicable, was used to manage the data?                                                                                                       | X        |
| 28. Participant checking                       | Did participants provide feedback on the findings?                                                                                                               | n/a      |
| Reporting                                      |                                                                                                                                                                  |          |
| 29. Quotations presented                       | Were participant quotations presented to illustrate the themes / findings? Was each quotation identified? <i>E.g., Participant number</i>                        | x        |
| 30. Data and findings consistent               | Was there consistency between the data presented and the findings?                                                                                               | x        |
| 31. Clarity of major themes                    | Were major themes clearly presented in the findings?                                                                                                             | n/a      |
| 32. Clarity of minor themes                    | Is there a description of diverse cases or discussion of minor themes?                                                                                           | n/a      |

*Supplemental Table 2*  
**Acceptability/Feasibility Survey**

| 1. Please Rate Your <i>First Reaction</i> to the ENABLE Program as we Described.<br><i>(Please circle one.)</i>                                                                                                                        | 1<br>Poor                   | 2<br>Fair                  | 3<br>Good      | 4<br>Very Good           | 5<br>Excellent            |
|----------------------------------------------------------------------------------------------------------------------------------------------------------------------------------------------------------------------------------------|-----------------------------|----------------------------|----------------|--------------------------|---------------------------|
| 2. We are creating a program called “EPIC” for COPD and adapting it from the ENABLE© program. How <i>acceptable</i> do you think patients with COPD and their family caregivers would find such a program? <i>(Please circle one.)</i> | 1<br>Extremely Unacceptable | 2<br>Somewhat Unacceptable | 3<br>Undecided | 4<br>Somewhat Acceptable | 5<br>Extremely Acceptable |
| 3. How <i>feasible</i> do you think a program like EPIC would be for people with COPD and their family caregivers? <i>(Please circle one.)</i>                                                                                         | 1<br>Extremely Unfeasible   | 2<br>Somewhat Unfeasible   | 3<br>Undecided | 4<br>Somewhat Feasible   | 5<br>Extremely Feasible   |
| 4. Please rate the design of the ENABLE© guidebooks, such as the color, pictures, printed text, and readability? <i>(Please circle one.)</i>                                                                                           | 1<br>Poor                   | 2<br>Fair                  | 3<br>Good      | 4<br>Very Good           | 5<br>Excellent            |
| 5. How likely do you think that people with COPD and their family caregivers would attend a clinic appointment at the UAB Palliative and Supportive Care Clinic? <i>(Please circle one.)</i>                                           | 1<br>Extremely Unlikely     | 2<br>Somewhat Unlikely     | 3<br>Undecided | 4<br>Somewhat Likely     | 5<br>Extremely Likely     |
| 6. How likely do you think that people with COPD and their family caregivers would be to video chat with a healthcare professional at the UAB Palliative and Supportive Care Clinic? <i>(Please circle one.)</i>                       | 1<br>Extremely Unlikely     | 2<br>Somewhat Unlikely     | 3<br>Undecided | 4<br>Somewhat Likely     | 5<br>Extremely Likely     |
| 7. <i>(For patients/family caregivers)</i> How likely would you be to participate in EPIC? <i>(Please circle one.)</i>                                                                                                                 | 1<br>Extremely Unlikely     | 2<br>Somewhat Unlikely     | 3<br>Undecided | 4<br>Somewhat Likely     | 5<br>Extremely Likely     |
| 8. <i>(For clinicians)</i> How likely would you be to recommend EPIC to your COPD patients or other clinicians?                                                                                                                        | 1<br>Extremely Unlikely     | 2<br>Somewhat Unlikely     | 3<br>Undecided | 4<br>Somewhat Likely     | 5<br>Extremely Likely     |
| 9. How <i>feasible</i> are the data collection instruments, or surveys, for people living with COPD and their caregivers?                                                                                                              | 1<br>Extremely Unfeasible   | 2<br>Somewhat Unfeasible   | 3<br>Undecided | 4<br>Somewhat Feasible   | 5<br>Extremely Feasible   |

*Supplemental Table 3*  
**Patient and Family Caregiver Data Collection Instruments**

| Instrument                                   | Description                                                                                                                                                                                                                                                                    |
|----------------------------------------------|--------------------------------------------------------------------------------------------------------------------------------------------------------------------------------------------------------------------------------------------------------------------------------|
| Chronic respiratory questionnaire            | 20-item measure of quality of life in COPD across domains of dyspnea, fatigue, emotional function, and mastery. Higher scores → better. MCID=0.5 ( $\alpha=0.70$ ) <sup>38</sup>                                                                                               |
| Patient assessment of chronic illness care   | 20 items with 5 dimensions: activation, decision support, goal setting, problem solving, and coordination. <sup>39</sup>                                                                                                                                                       |
| PROMIS global health                         | 10-item measure with physical and mental health domains; 9 questions rated on a four-point Likert-scale, and 10th question rates pain on a scale of 0 to 10. Raw scores converted to standardized t-scores ranging from 0 to 100, with lower scores → worse QOL. <sup>40</sup> |
| PROMIS emotional distress anxiety SF 8B      | 8 item measure of fear (fearfulness, panic), anxious misery (worry, dread), & hyperarousal (tension, nervous) in the past week. Higher scores → worse anxiety. <sup>41</sup>                                                                                                   |
| PROMIS emotional distress – depression SF 8B | 8 item measure of negative mood (hopelessness, depressed), views of self-criticism, and worthlessness in the past week. Higher scores → more depression. <sup>41</sup>                                                                                                         |
| UAB study of aging life space assessment     | 15-item measure of Life-Space mobility, or the frequency, distance, and independence of movement, in the 4 weeks prior to administration; score <60 → restricted Life-Space mobility; Lower scores → more restricted; MCID=5 points ( $\alpha =0.80$ ) <sup>42</sup>           |
| Dyadic symptom management type scale         | 1-item; four dyad typologies– patient-centered, caregiver-centered, collaborative, and complimentary <sup>43</sup>                                                                                                                                                             |
| Dyadic adjustment scale 7-item SF            | 7-item measure of agreement on relational factors (e.g., shared philosophy, goals and time spent together) <sup>44</sup>                                                                                                                                                       |
| Montgomery borgatta caregiver burden         | 14-item measure of caregiver burden along domains of objective burden ( $\alpha=0.87-0.90$ ), subjective demand burden ( $\alpha=0.68-0.82$ ), and subjective stress burden ( $\alpha=0.81-0.88$ ); higher scores → greater burden <sup>45,46</sup>                            |
| Positive aspects of caregiving               | 9-item measure of mental-affective state (self-affirmation, life view) in the caregiving experience. Five-point scale 1= <i>Disagree a lot</i> ; 5= <i>Agree a lot</i> . Higher scores → positive caregiving <sup>47</sup>                                                     |
